# Supplementary material
Source: PubMed Central journal article supplement (PMC1450226)
Supplement: pnas_0600166103_1.pdf [file pnas_0600166103_1.pdf]

Fig. 6. Reproductive number. y axis:  $R_0$  for epidemic within a naive population, initiated by introduction of bacteria. x axis: bacterial median infectious dose. Solid lines:  $R_0$  for parameters in bloom-induced example ( $\phi = 0.67$ ); dashed lines:  $R_0$  for parameters in instability-induced example ( $\phi = 1.5$ ). In each group, lines from left to right: exponent  $a = 15, 7, 2$ .

Fig. 7. Extent of bloom-induced epidemics with phage absent, bacterial density under resource control. y axis: number of disease cases in excess of equilibrium prevalence (0.5 per 1,000), over 1 year postoutbreak. x axis: bacterial growth rate per day. Initial bacterial density: open circles,  $100 \times K_v$  ( $K_v = 2.5 \times 10^6$  cells/liter); filled circles,  $10 \times$ ; open squares,  $3 \times$ . Other parameters:  $k = 4 \times 10^7$ ,  $\mu_- = 0.1$ ,  $\phi = 0.67$ ,  $\pi = 0.1$ ,  $\delta \sim 10^{-4}$ ,  $a = 7$ .

Fig. 8. Phage-moderated epidemics, bacterial density under resource control. Epidemics induced by an initial bacterial density of  $10 \times K_v$ . y axis: number of disease cases prevented, compared to the zero-phage epidemic. x axis: initial phage density. Open circles, phage decay rate  $\omega = 0.525$ ; filled circles,  $\omega = 2.100$ ; open squares,  $\omega = 8.400$ . Other parameters:  $m = 0.3$ ,  $l = 2.1 \times 10^7$ ,  $\alpha = 1$ , others as in Fig. 7. (*Inset*) Effect of bacterial growth rate on number of cases prevented, for  $\omega = 0.525$  and initial phage density  $10^7$  virions/liter.

Fig. 9. Phage-moderated epidemics, bacterial density under phage control. Epidemics induced by reducing initial phage density below equilibrium level, phage decay rate  $\omega = 0.525$ . y axis: number of disease cases in excess of equilibrium prevalence (0.5 per 1,000), under bacteria-phage reservoir equilibrium. x axis: initial phage density, as fraction of equilibrium phage density.  $\phi(\omega, a)$ : open circles, 1.5 (0.525, 7); open diamonds, 2.0 (0.394, 7);

filled circles, 3.0 (0.263, 5); open squares, 5.0 (0.158, 3). Other parameters as in Fig. 8. (*Inset*) Effect of bacterial growth rate on number of excess cases, for  $\omega = 0.525$  and initial phage density 1% of equilibrium.
