# Supplementary material
Source: PubMed Central journal article supplement (PMC1450226)

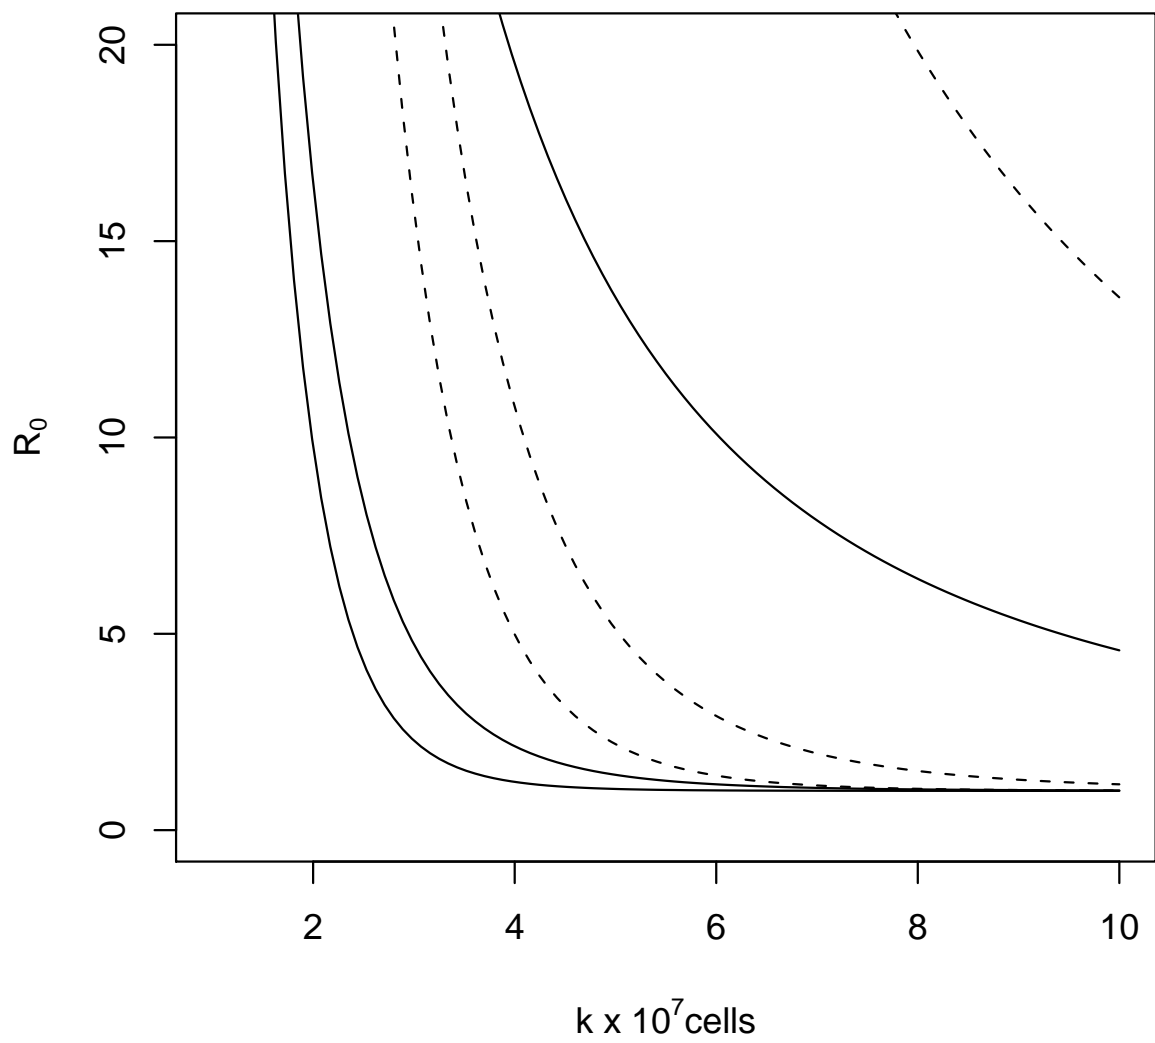

Supplement: pnas_0600166103_2.pdf [file pnas_0600166103_2.pdf]

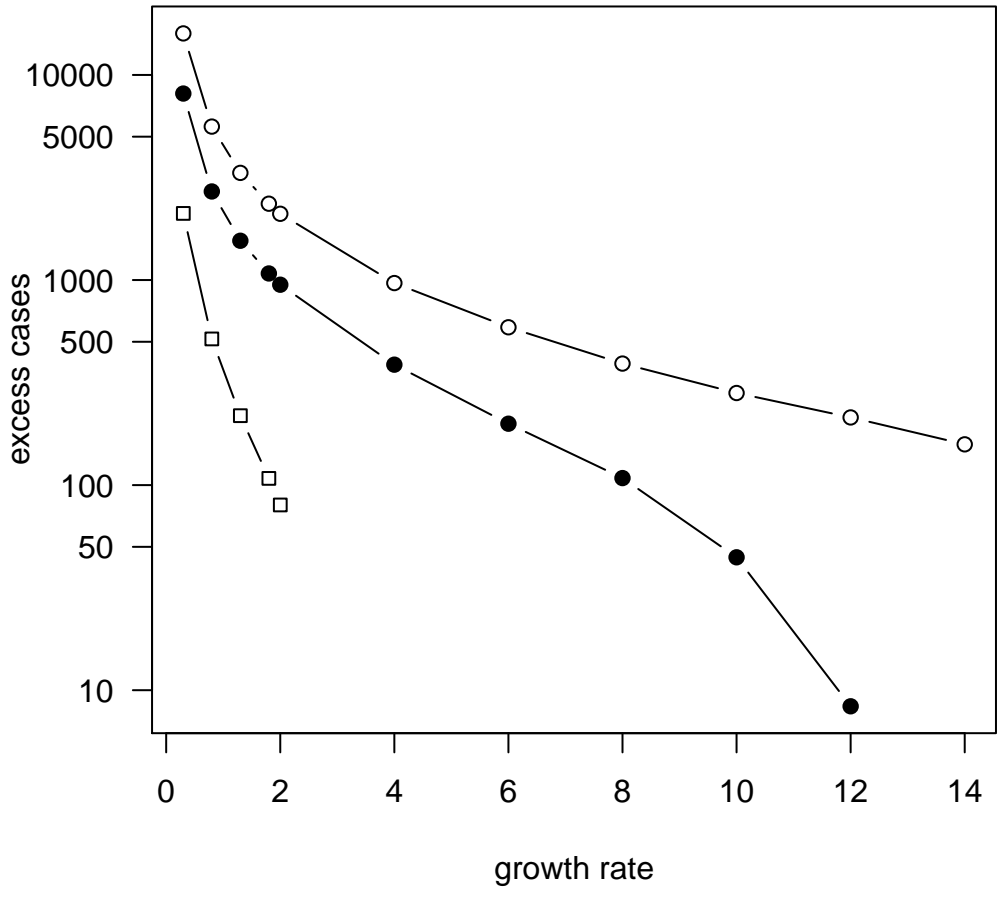

Supplement: pnas_0600166103_3.pdf [file pnas_0600166103_3.pdf]

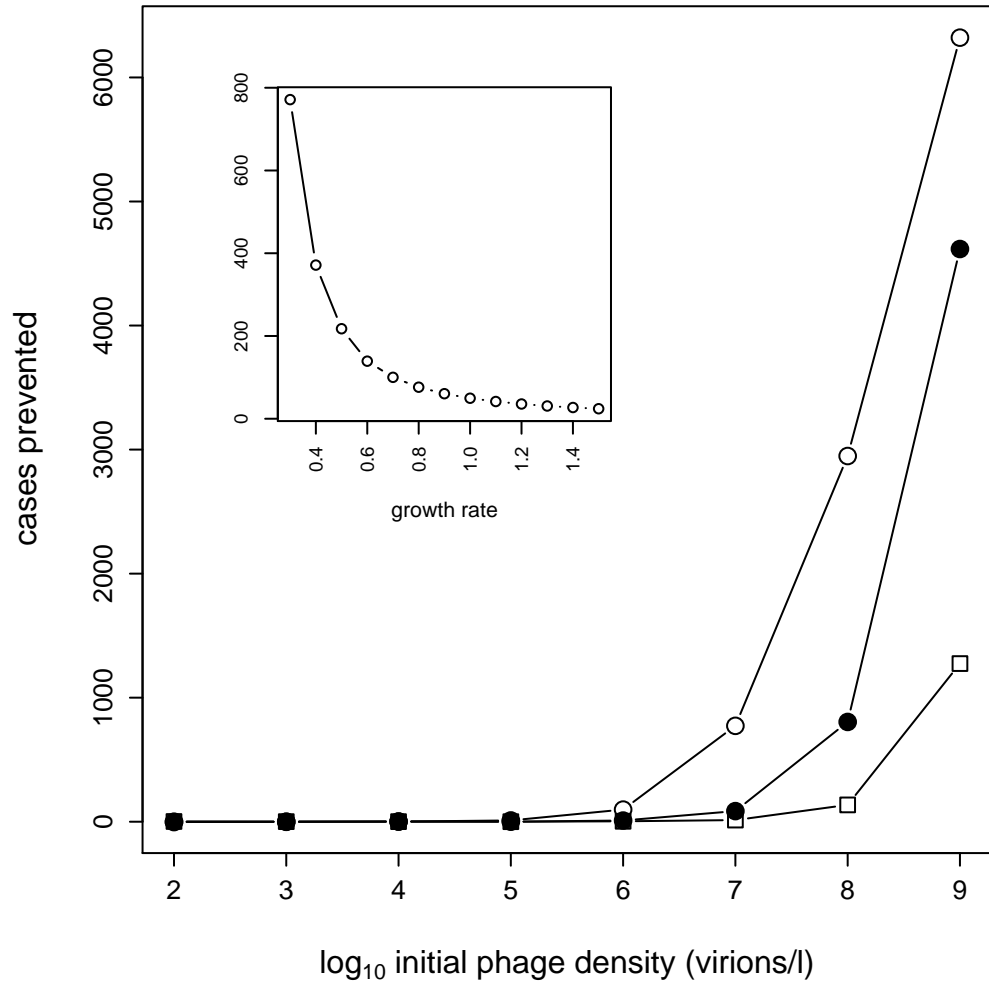

Supplement: pnas_0600166103_4.pdf [file pnas_0600166103_4.pdf]

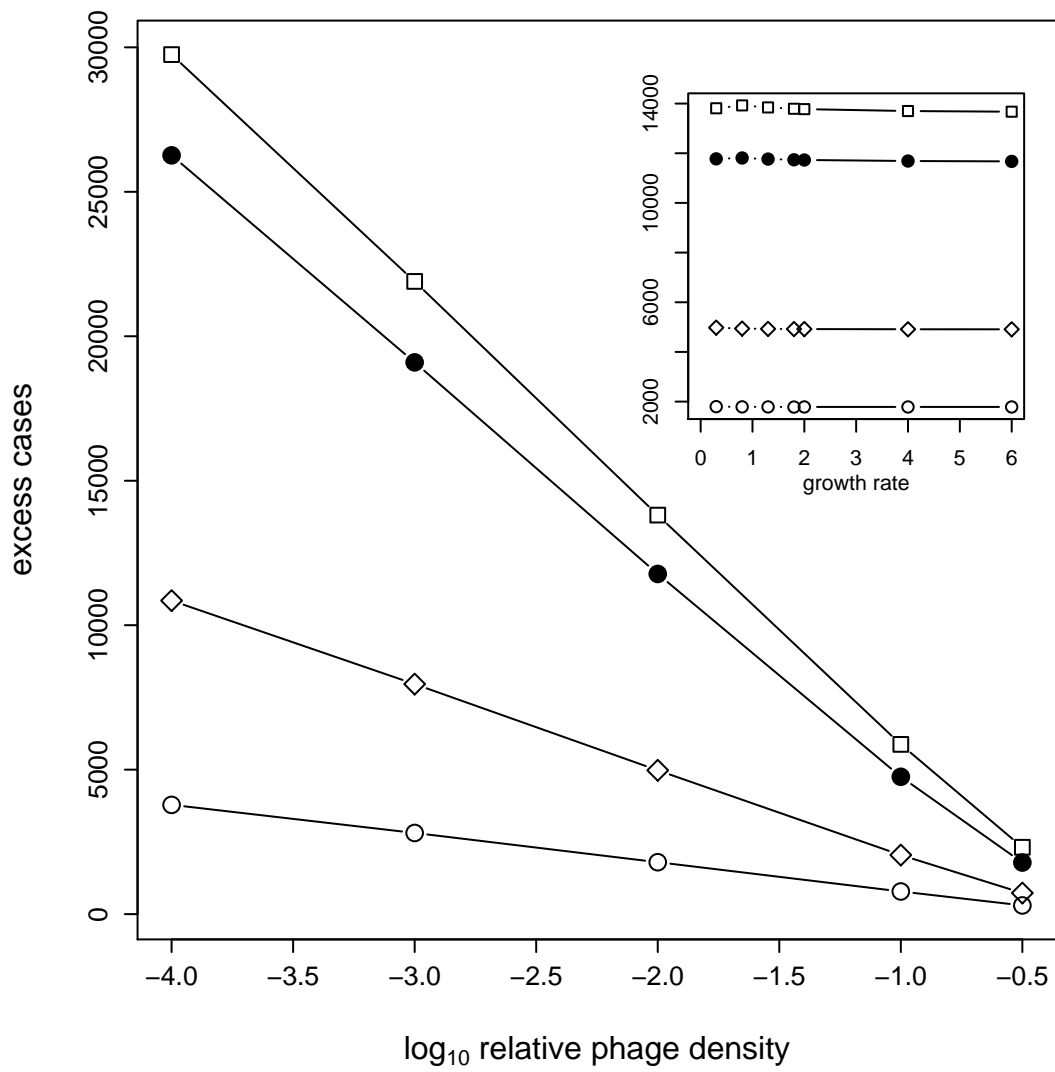

Supplement: pnas_0600166103_5.pdf [file pnas_0600166103_5.pdf]
